# Journal of Experimental Biology

The online version of Journal of Experimental Biology is considered to be the version of record

## Editor-in-Chief

Craig E. Franklin (University of Queensland, Australia)

## Deputy Editors-in-Chief

Sheila N. Patek (Duke University, USA)

Patricia A. Wright (University of Guelph, Canada)

## Monitoring Editors

Andrew A. Biewener (Harvard University, USA)

Monica Daley (University of California Irvine, USA)

Julian A. T. Dow (University of Glasgow, UK)

Stuart Egginton (University of Leeds, UK)

Kathleen M. Gilmour (University of Ottawa, Canada)

Almut Kelber (Lund University, Sweden)

Ken Lukowiak (University of Calgary, Canada)

Sanjay P. Sane (National Center for Biological Sciences, India)

Patricia M. Schulte (The University of British Columbia, Canada)

## Managing Editor

Michaela J. P. Handel

## News and Views Editor

Kathryn Knight

## Reviews Editors

Stefan Galander (cross-journal)

Charlotte E. Rutledge

## Production Editors

Andrea Bowden

Emma N. Kelly

Kate L. Vaughan

## Editorial Administrators

Sue E. Chamberlain

Laura Mason

Will Pallett

## Editorial Office

Journal of Experimental Biology

The Company of Biologists Limited

Bidder Building

Station Road

Histon

Cambridge CB24 9LF, UK

Tel: +44 1223 632871

Fax: +44 1223 632873

jeb@biologists.com

## Editorial Advisory Board

Shelley A. Adamo (Dalhousie University, Canada)

Stephen C. Adolph (Harvey Mudd College, USA)

Michael Berenbrink (University of Liverpool, UK)

Philip E. Bickler (University of California San Francisco, USA)

Verner P. Bingman (Bowling Green State University, USA)

Simone Blomberg (University of Queensland, Australia)

Elizabeth L. Brainerd (Brown University, USA)

Geoffrey M. Coast (Birkbeck, University of London, UK)

Thomas S. Collett (University of Sussex, UK)

Stacey Combes (University of California Davis, USA)

Andrew R. Cossins (University of Liverpool, UK)

Suzanne Currie (Acadia University, Canada)

Mark W. Denny (Stanford University, USA)

Michael H. Dickinson (California Institute of Technology, USA)

Walter Federle (University of Cambridge, UK)

Martin Grosell (University of Miami, USA)

Cheryl Hayashi (American Museum of Natural History, USA)

Jan Hemmi (University of Western Australia, Australia)

Hans H. Hoppeler (University of Bern, Switzerland)

David Hu (Georgia Institute of Technology, USA)

Sönke Johnsen (Duke University, USA)

Lynn B. Martin (University of South Florida, USA)

Alison Mercer (University of Otago, New Zealand)

William K. Milsom (University of British Columbia, Canada)

Rajat Mittal (Johns Hopkins University, USA)

Fernando Montealegre-Z (University of Lincoln, UK)

Cynthia F. Moss (University of Maryland, USA)

Gabrielle A. Nevitt (University of California Davis, USA)

Göran E. Nilsson (University of Oslo, Norway)

Michael J. O'Donnell (McMaster University, Canada)

Steve F. Perry (University of Ottawa, Canada)

Jeffrey G. Richards (University of British Columbia, Canada)

Frank Seebacher (University of Sydney, Australia)

Holly Shiels (The University of Manchester, UK)

Brent J. Sinclair (Western University, Canada)

Kenneth Söderhäll (Uppsala University, Sweden)

George N. Somero (Stanford University, USA)

Raul K. Suarez (University of British Columbia, Canada)

Eric D. Tytell (Tufts University, USA)

Dehua Wang (Chinese Academy of Sciences, China)

Tobias Wang (University of Aarhus, Denmark)

Z. Jane Wang (Cornell University, USA)

Craig R. White (Monash University, Australia)

Alan M. Wilson (The Royal Veterinary College, UK)

Christopher M. Wood (McMaster University, Canada)
